# Supplementary material
Source: Springer Nature journal article supplement (https://www.springermedizin.de/resource/supplementary/12894_2014_377_MOESM1_ESM.pdf/9513652)

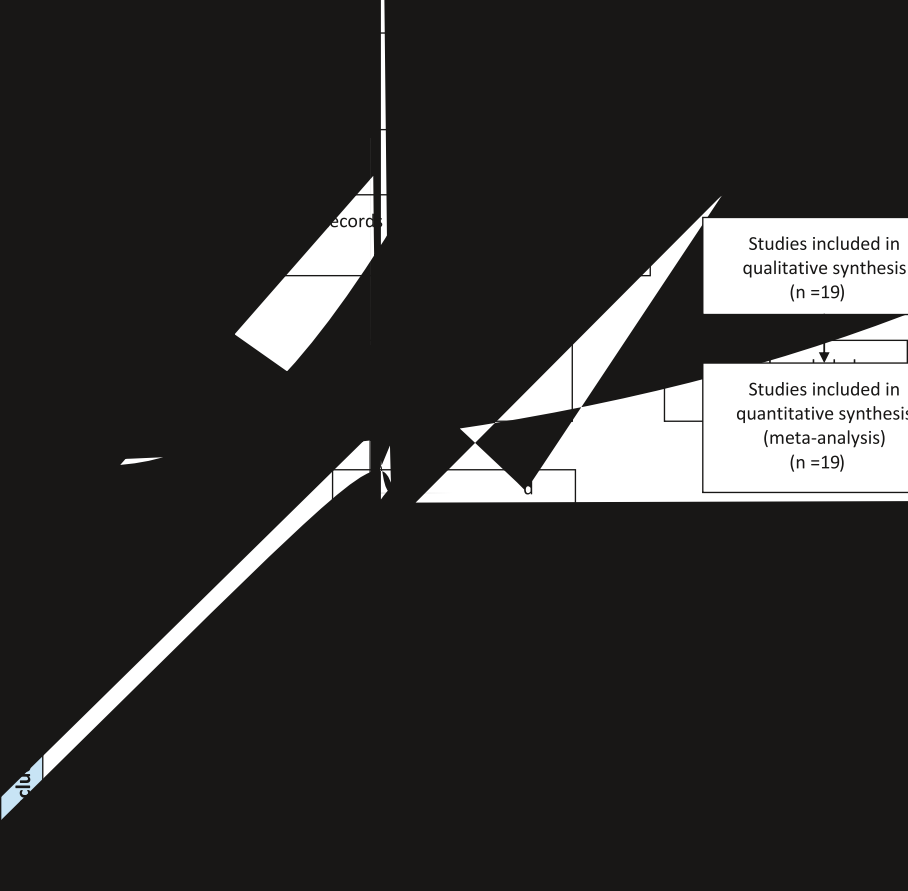

Supplement: MOESM1 [file 9513652]
